# Supplementary material for: KLF6 Suppresses Metastasis of Clear Cell Renal Cell Carcinoma via Transcriptional Repression of E2F1
Source: Oxford University Press journal article supplement (doi:10.1158/0008-5472.can-16-0348), 2016-10-25
Supplement: 00085472can160348-sup-161773_2_supp_3692044_ddkx1g.docx [file 00085472can160348-sup-161773_2_supp_3692044_ddkx1g.docx]

| Clinicopathological parameters | No. (%) |
| --- | --- |
|  | (n=87) |
| Gender |  |
| Male | 60 (69.0) |
| Female | 27 (31.0) |
| Age (years) |  |
| ＜60 | 53 (61.0) |
| ≥60 | 34 (39.0) |
| BMI |  |
| ＜25 | 36 (41.4) |
| ≥25 | 51 (58.6) |
| T stage |  |
| T1+T2 | 70 (80.5) |
| T3+T4 | 17 (19.5) |
| Clinical stages(TNM) |  |
| Ⅰ+Ⅱ | 67 (77.0) |
| Ⅲ+Ⅳ | 20 (23.0) |
| Fuhrman grade |  |
| G1+G2 | 72 (82.8) |
| G3+G4 | 15 (17.2) |

Supplementary Table S3: Patients’ clinical characteristics

**TNM staging:** TNM stage grouping was assigned according to the 2009 TNM staging classification system. **Abbreviation**：BMI，body mass index.
