# Supplementary material for: KLF6 Suppresses Metastasis of Clear Cell Renal Cell Carcinoma via Transcriptional Repression of E2F1
Source: Oxford University Press journal article supplement (doi:10.1158/0008-5472.can-16-0348), 2016-10-25
Supplement: 00085472can160348-sup-161773_2_supp_3694809_wwnwk3.docx [file 00085472can160348-sup-161773_2_supp_3694809_wwnwk3.docx]

Supplementary Figure S1: CpG island of the KLF6 locus was predicted in plot and the primers were designed. (http://www.urogene.org/cgi-bin/methprimer/methprimer.cgi)

Supplementary Figure S2: The ranking ﬂow chart of the differentiated genes on the data set.

Supplementary Figure S3: The quantification of protein expression levels on IHC stained tissue slides in the platform of TissueGnostics GmbH (Vienna, Austria). The results about KLF6 and E2F1 expression are highly consistent with our scoring system.
